# Supplementary material
Source: MDPI journal article supplement (https://www.mdpi.com/2073-4344/9/11/901)
Supplement: s1 [file s1]

Supplements.

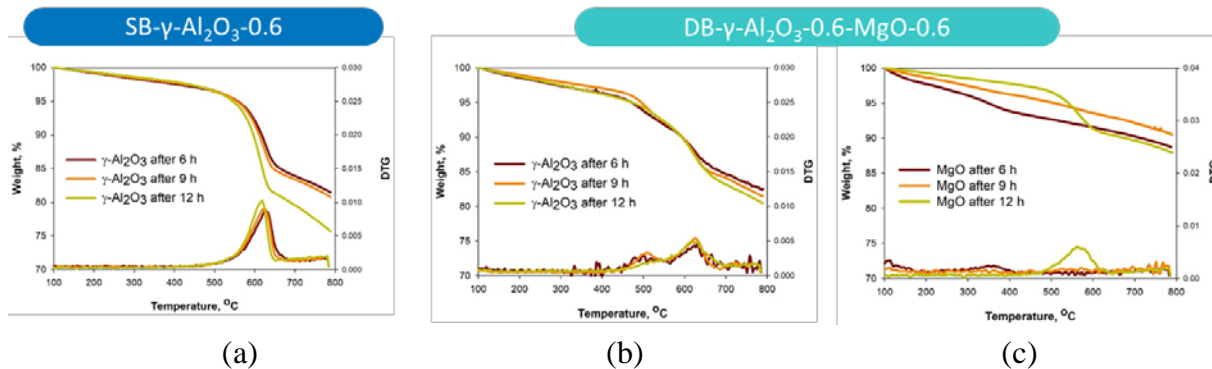

Figure S1. TG and DTG patterns of spent catalyst in (a) SB- $\gamma$ -Al<sub>2</sub>O<sub>3</sub>-0.6 and (b)  $\gamma$ -Al<sub>2</sub>O<sub>3</sub> and (c) MgO in DB- $\gamma$ -Al<sub>2</sub>O<sub>3</sub>-0.6-MgO-0.6.
